1 The Hallucination Machine: A Deep-Dream VR platform for Studying the Phenomenology of  
2 Visual Hallucinations

3

4 Keisuke Suzuki, Warrick Roseboom, David J. Schwartzman, Anil K. Seth

5

6 Sackler Centre for Consciousness Science, University of Sussex, Brighton BN1 9QJ, United Kingdom

7 and

8 Department of Informatics, University of Sussex, Brighton BN1 9QJ, United Kingdom

9 **Corresponding Author:** Keisuke Suzuki, Sackler Centre for Consciousness Science, University of Sussex, Brighton

10 BN1 9QJ, United Kingdom, [K.Suzuki@sussex.ac.uk](mailto:K.Suzuki@sussex.ac.uk)

11 **Abstract**

12 Altered states of consciousness, such as psychotic or pharmacologically-induced  
13 hallucinations, provide a unique opportunity to examine the mechanisms underlying  
14 conscious perception. However, the phenomenological properties of these states are  
15 difficult to isolate experimentally from other, more general physiological and cognitive  
16 effects of psychoactive substances or psychopathological conditions. Thus, simulating  
17 phenomenological aspects of altered states in the absence of these other more general  
18 effects provides an important experimental tool for consciousness science and psychiatry.  
19 Here we describe such a tool, the *Hallucination Machine*. It comprises a novel combination  
20 of two powerful technologies: deep convolutional neural networks (DCNNs) and panoramic  
21 videos of natural scenes, viewed immersively through a head-mounted display (panoramic  
22 VR). By doing this, we are able to simulate visual hallucinatory experiences in a biologically  
23 plausible and ecologically valid way. Two experiments illustrate potential applications of the  
24 *Hallucination Machine*. First, we show that the system induces visual phenomenology  
25 qualitatively similar to classical psychedelics. In a second experiment, we find that simulated  
26 hallucinations do not evoke the temporal distortion commonly associated with altered  
27 states. Overall, the *Hallucination Machine* offers a valuable new technique for simulating  
28 altered phenomenology without directly altering the underlying neurophysiology.

29

30 Keywords: Visual hallucinations, virtual reality, visual phenomenology, deep convolutional  
31 neural networks, machine learning.

## 32 **1.0 Introduction**

33 There is a long history of studying altered states of consciousness (ASC) in order to  
34 better understand phenomenological properties of conscious perception<sup>1,2</sup>. Altered states  
35 are defined as a *qualitative* alteration in the overall pattern of mental functioning, such that  
36 the experiencer feels their consciousness is radically different from "normal"<sup>1-3</sup>, and are  
37 typically considered distinct from common global alterations of consciousness such as  
38 dreaming. ASC are not defined by any particular content of consciousness, but cover a wide  
39 range of qualitative properties including temporal distortion, disruptions of the self, ego-  
40 dissolution, visual distortions and hallucinations, among others<sup>4-7</sup>. Causes of ASC include  
41 psychedelic drugs (e.g., LSD, psilocybin) as well as pathological or psychiatric conditions such  
42 as epilepsy or psychosis<sup>8-10</sup>. In recent years, there has been a resurgence in research  
43 investigating altered states induced by psychedelic drugs. These studies attempt to  
44 understand the neural underpinnings that cause altered conscious experience<sup>11-13</sup> as well  
45 as investigating the potential psychotherapeutic applications of these drugs<sup>4,12,14</sup>. However,  
46 psychedelic compounds have many systemic physiological effects, not all of which are likely  
47 relevant to the generation of altered perceptual phenomenology. It is difficult, using  
48 pharmacological manipulations alone, to distinguish the primary causes of altered  
49 phenomenology from the secondary effects of other more general aspects of  
50 neurophysiology and basic sensory processing. Understanding the specific nature of altered  
51 phenomenology in the psychedelic state therefore stands as an important experimental  
52 challenge.

53 Here, we address this challenge by combining virtual reality and machine learning to  
54 isolate and simulate one specific aspect of psychedelic phenomenology: visual hallucinations.  
55 In machine learning, deep neural networks (DNNs) developed for machine vision have now  
56 improved to a level comparable to that achieved by humans<sup>15,16</sup>. For example, deep  
57 convolutional neural networks (DCNNs) have been particularly successful in the difficult task  
58 of object recognition in photographs of natural scenes<sup>17,18</sup>.

59 Studies comparing the internal representational structure of trained DCNNs with  
60 primate and human brains performing similar object recognition tasks, have revealed  
61 surprising similarities in the representational spaces between these two distinct systems<sup>19-</sup>  
62<sup>21</sup>. For example, the neural responses induced by a visual stimulus in the human inferior  
63 temporal (IT) cortex, widely implicated in object recognition, have been shown to be similar  
64 to the activity pattern of higher (deeper) layers of the DCNN<sup>22,23</sup>. Features selectively  
65 detected by lower layers of the same DCNN bear striking similarities to the low-level  
66 features processed by the early visual cortices such as V1 and V4. These findings  
67 demonstrate that even though DCNNs were not explicitly designed to model the visual  
68 system, after training for challenging object recognition tasks they show marked similarities  
69 to the functional and hierarchical structure of human visual cortices.

70 Trained DCNNs are highly complex, with many parameters and nodes, such that their  
71 analysis requires innovative visualisation methods. Recently, a novel visualisation algorithm

72 called *Deep Dream* was developed for this purpose<sup>24,25</sup>. *Deep Dream* works by clamping the  
73 activity of nodes at a user-defined layer in the DCNN and then inverting the information  
74 flow, so that an input image is changed until the network settles into a stable state (some  
75 additional constraints are needed, e.g. ensuring that neighbouring pixels remain strongly  
76 correlated). Intuitively, this means changing the *image* rather than changing the *network* in  
77 order to match the features of the image with what is represented in the target layer – so  
78 that the resulting image is shaped by what the network ‘expects’ to see, at the level of detail  
79 determined by the clamped layer. More precisely, the algorithm modifies natural images to  
80 reflect the categorical features learnt by the network<sup>24,25</sup>, with the nature of the  
81 modification depending on which layer of the network is clamped (see Figure 1). What is  
82 striking about this process is that the resulting images often have a marked ‘hallucinatory’  
83 quality, bearing intuitive similarities to a wide range of psychedelic visual hallucinations  
84 reported in the literature (e.g. McKenna, 2004; Shanon, 2002; Siegel & Jarvik, 1975)(see  
85 Figure 1).

86 We set out to simulate the visual hallucinatory aspects of the psychedelic state using  
87 *Deep Dream* to produce biologically realistic visual hallucinations. To enhance the immersive  
88 experiential qualities of these hallucinations, we utilised virtual reality (VR). While previous  
89 studies have used computer-generated imagery (CGI) in VR that demonstrate some  
90 qualitative similarity to visual hallucinations<sup>28,29</sup>, we aimed to generate highly naturalistic  
91 and dynamic simulated hallucinations. To do so, we presented 360-degree (panoramic)  
92 videos of pre-recorded natural scenes within a head-mounted display (HMD), which had  
93 been modified using the *Deep Dream* algorithm. The presentation of panoramic video using  
94 a HMD equipped with head-tracking (panoramic VR) allows the individual’s actions  
95 (specifically, head movements) to change the viewpoint in the video in a naturalistic manner.  
96 This congruency between visual and bodily motion allows participants to experience  
97 naturalistic simulated hallucinations in a fully immersive way, which would be impossible to  
98 achieve using a standard computer display or conventional CGI VR. We call this combination  
99 of techniques the *Hallucination Machine*.

100 To investigate the extent to which the *Hallucination Machine* is able to simulate  
101 natural visual hallucinations, we conducted two proof-of-concept experiments. The first  
102 experiment investigated the ecological validity of experiences produced by the *Hallucination*  
103 *Machine*. We compared the simulated experiences produced by the *Hallucination Machine*  
104 to unaltered control videos (see Figure 1) and to those of pharmacological psychedelic  
105 states by having participants rate their subjective experience using an ASC questionnaire  
106 developed to assess psychedelic experiences<sup>30,31</sup>. In a second experiment, we investigated if  
107 the experience of the *Hallucination Machine* would also lead to a commonly reported  
108 aspect of altered states of consciousness - temporal distortion<sup>5,6</sup>

109

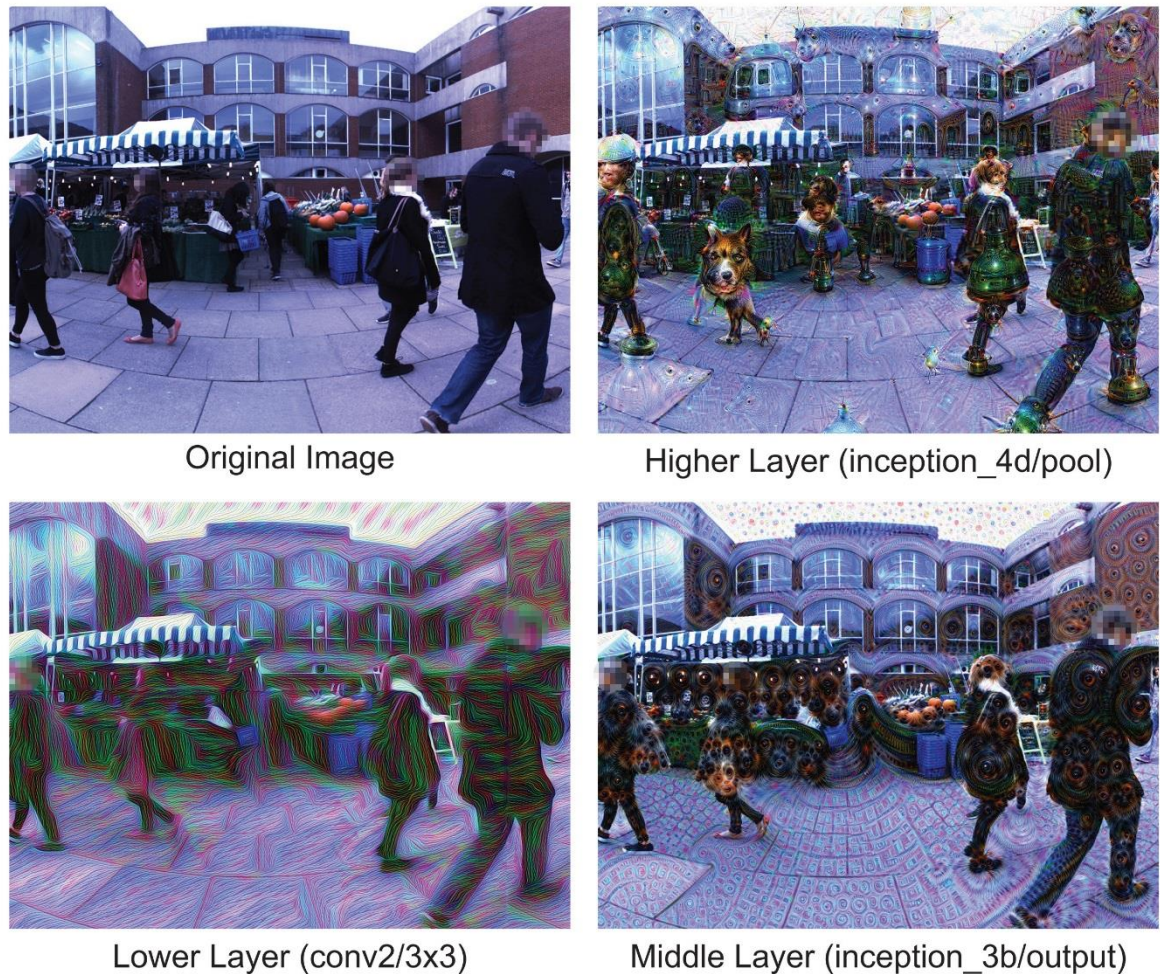

### Deep-Dreamed Images

110

111 **Figure 1.** An example of the original scene (top left) and *Deep-Dreamed* scenes (top right,  
112 bottom left and right). The top right image was generated by selecting a higher DCNN layer  
113 that responds selectively to higher-level categorical features (layers = 'inception\_4d/pool',  
114 octaves = 3, octave scale = 1.8, iterations = 32, jitter = 32, zoom = 1, step size = 1.5, blending  
115 ratio for optical flow = 0.9, blending ratio for background = 0.1, for more detail see <sup>48</sup>). We  
116 used these higher-level parameters to generate the *Deep Dream* video used throughout the  
117 reported experiments. The bottom left image was generated by fixing the activity of a lower  
118 DCNN layer that responds selectively to geometric image features (layer='conv2/3x3', other  
119 parameters as above). The bottom right image was generated by selecting a middle DCNN  
120 layer responding selectively to parts of objects (layer='inception\_3b/output', other  
121 parameters as above).

122

## 123 2.0 Results

124 We constructed the *Hallucination Machine* by applying a modified version of the  
125 *Deep Dream* algorithm <sup>25</sup> to each frame of a pre-recorded panoramic video (Figure 1, see  
126 also Supplemental Video S1) presented using a HMD. Participants could freely explore the

127 virtual environment by moving their head, experiencing highly immersive dynamic  
128 hallucination-like visual scenes.

## 129 2.1 Experiment 1: Subjective experience during simulated hallucination

130 In Experiment 1, we compared subjective experiences evoked by the *Hallucination*  
131 *Machine* with those elicited by both control videos (within subjects) and by  
132 pharmacologically induced psychedelic states<sup>31</sup> (across studies). Twelve participants took  
133 part in Experiment 1. The results are shown in Figure 2. Visual inspection of the spider chart  
134 reveals that, across all dimensions of subjective experience probed by the questionnaire,  
135 the experiences elicited by the *Hallucination Machine* are qualitatively distinct from the  
136 control videos (Fig 2a), but qualitatively similar to psilocybin experiences (Fig 2b).

137 To quantify these observations, we first conducted Bayesian within-subject *t*-tests  
138 comparing responses to the ASC questionnaire following *Hallucination Machine*, and  
139 following control videos, on the null hypothesis of ‘no difference’. The analysis revealed  
140 evidence supporting the alternative hypothesis, suggesting that for the following  
141 dimensions there was a significant difference in subjective ratings between video type:  
142 ‘intensity’, ‘patterns’, ‘imagery’, ‘ego’, ‘arousal’, ‘strange’, ‘vivid’, ‘space’, ‘muddle’, ‘spirit’  
143 (for statistics see Table 1). Bonferroni corrected, within-subject *t*-tests were consistent with  
144 the Bayesian results, with the exception of the ‘ego’, ‘muddle’, and ‘spirit’ dimensions as  
145 shown by the *p*-values in Table 1.

146 Independent Bayesian *t*-tests comparing responses to the ASC questionnaire  
147 following *the Hallucination Machine*, or following administration of psilocybin (data from a  
148 previous study<sup>31</sup>), also revealed evidence supporting the alternative hypothesis for the  
149 following dimension ‘intensity’, with weaker evidence for ‘pattern’ and ‘strange’, suggesting  
150 that there are some qualitative differences between *Hallucination Machine* and psilocybin  
151 experiences (see Table 1 for statistics). Crucially, for the remaining questions, Bayesian  
152 analyses were not sensitive to whether the null or alternative hypothesis was supported,  
153 but were trending in the direction of the null, i.e. no difference between subjective  
154 experiences between the *Hallucination Machine* and psilocybin: ‘vivid’  
155 ‘time’, ‘space’, ‘muddle’, ‘peace’, and ‘past’. Standard paired *t*-test Bonferroni corrected for  
156 multiple comparisons between ASC responses following the *Hallucination Machine* and  
157 psilocybin did not reach significance for any of the question.

158 Together these analyses suggest that for many dimensions of subjective experience  
159 – as reflected in the ASC questionnaire - the *Hallucination Machine* induced significant  
160 changes as compared to viewing unaltered control videos, and that these changes were  
161 broadly similar to those caused by the administration of psilocybin.

162  
163

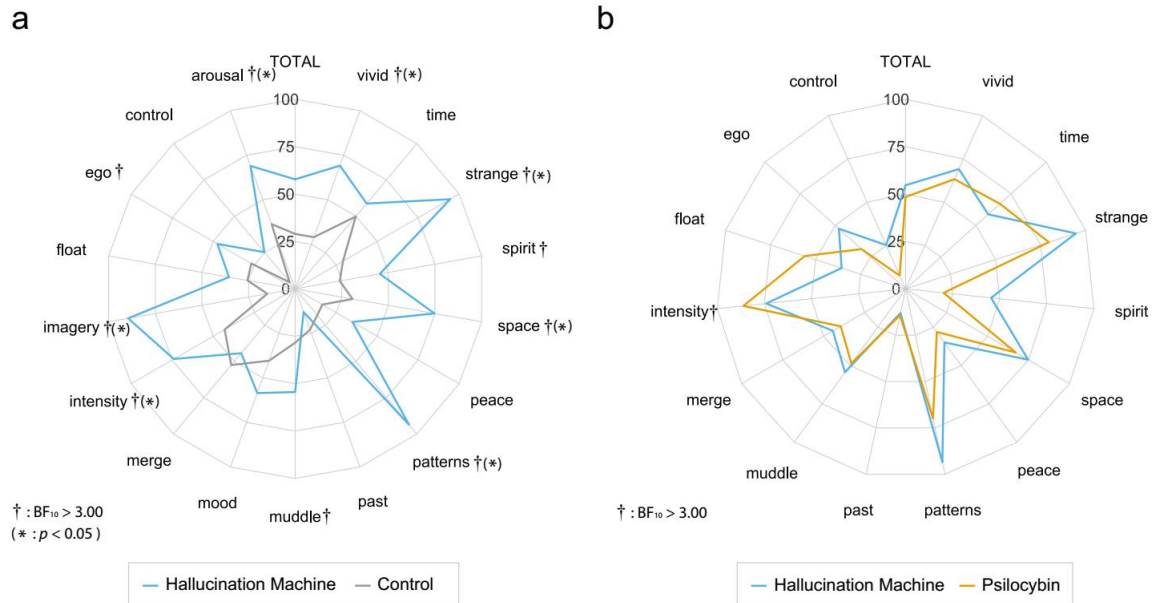

C

### Questions

|                  |                                                                             |                 |                                                    |
|------------------|-----------------------------------------------------------------------------|-----------------|----------------------------------------------------|
| <b>arousal</b>   | Please rate your general level of emotional arousal during the last session | <b>muddle</b>   | My thinking was muddled                            |
| <b>control</b>   | I feared losing control of my mind                                          | <b>past</b>     | I saw events from my past                          |
| <b>ego</b>       | I experienced a dissolving of my 'self' or 'ego'                            | <b>patterns</b> | I saw patterns and colours                         |
| <b>float</b>     | I felt like I was floating                                                  | <b>peace</b>    | I felt a profound inner peace                      |
| <b>imagery</b>   | I saw complex visual imagery                                                | <b>space</b>    | My sense of size and space was distorted           |
| <b>intensity</b> | Please rate the intensity of the experience during the last session         | <b>spirit</b>   | The experience had a spiritual or mystical quality |
| <b>merge</b>     | I experienced a sense of merging with my surroundings                       | <b>strange</b>  | Things looked strange                              |
| <b>mood</b>      | How positive was your mood during the last session                          | <b>time</b>     | My perception of time was distorted                |
|                  |                                                                             | <b>vivid</b>    | My imagination was extremely vivid                 |

164

165

166 **Figure 2.** ASC questionnaire responses obtained in Experiment 1. **a.** Comparison of  
 167 *Hallucination Machine* and control video responses. Stronger evidence in favour of a  
 168 difference using Bayesian  $t$ -tests between *Hallucination Machine* and the control videos  
 169 were found for ten of the questions ( $\dagger$ :  $BF_{10} > 3$ ). Standard  $t$ -test showed the significant  
 170 differences for eight of the questions ( $* p < 0.05$ ). **b.** Comparison of *Hallucination Machine*  
 171 and responses following administration of psilocybin, taken from <sup>31</sup>. Bayes Factor paired  
 172 sample  $t$ -tests revealed that responses to the question 'intensity' ( $\dagger$ :  $BF_{10} > 3$ ) after the  
 173 *Hallucination Machine* had stronger evidence in favour of a difference from the ratings given  
 174 for psilocybin experiences. **c.** Abbreviations and questions used in ASC questionnaire.

175 **Table 1.** Bayesian and standard statistical comparisons of ASCQ ratings from Experiment 1  
 176 between *Hallucination Machine* and control video exposure, and between *Hallucination*  
 177 *Machine* and psilocybin administration, data taken from <sup>31</sup>. Dagger symbols and bold text  
 178 indicates Bayes Factor values which show evidence in favour of a difference between ASCQ  
 179 responses ( $\dagger$ :  $BF_{10} > 3$ ). Asterisks after  $p$ -value indicates the significant differences in  
 180 standard  $t$ -test ( $* p < 0.05$ ). See Figure 2c for Abbreviations and questions used in ASCQ.

181

182

| Questions | Hallucination Machine vs control videos  |              |                                      |                            | Hallucination Machine vs psilocybin      |              |                                      |                            |
|-----------|------------------------------------------|--------------|--------------------------------------|----------------------------|------------------------------------------|--------------|--------------------------------------|----------------------------|
|           | BF <sub>10</sub><br>(Bayesian<br>t-test) | t(11)        | p-value<br>(Bonferroni<br>corrected) | Effect Size<br>(Cohen's d) | BF <sub>10</sub><br>(Bayesian<br>t-test) | t(25)        | p-value<br>(Bonferroni<br>corrected) | Effect Size<br>(Cohen's d) |
| intensity | <b>28.09 †</b>                           | <b>4.185</b> | <b>0.034 *</b>                       | <b>1.208</b>               | <b>3.404 †</b>                           | <b>-2.55</b> | <b>0.306</b>                         | <b>-1.004</b>              |
| patterns  | <b>389022 †</b>                          | <b>13.7</b>  | <b>0.017 *</b>                       | <b>3.955</b>               | 2.545                                    | 2.364        | 0.442                                | 0.916                      |
| imagery   | <b>18187 †</b>                           | <b>9.803</b> | <b>0.017 *</b>                       | <b>2.83</b>                | -                                        | -            | -                                    | -                          |
| mood      | 0.866                                    | 1.685        | 2.04                                 | 0.486                      | -                                        | -            | -                                    | -                          |
| ego       | <b>3.162 †</b>                           | <b>2.669</b> | <b>0.374</b>                         | <b>0.77</b>                | 0.69                                     | 1.335        | 3.298                                | 0.517                      |
| arousal   | <b>37.58 †</b>                           | <b>4.391</b> | <b>0.017 *</b>                       | <b>1.268</b>               | -                                        | -            | -                                    | -                          |
| strange   | <b>1721 †</b>                            | <b>7.44</b>  | <b>0.017 *</b>                       | <b>2.148</b>               | 2.993                                    | 2.467        | 0.357                                | 0.955                      |
| vivid     | <b>122.1 †</b>                           | <b>5.254</b> | <b>0.017 *</b>                       | <b>1.1517</b>              | 0.437                                    | 0.723        | 8.109                                | 0.28                       |
| time      | 0.39                                     | 0.849        | 7.038                                | 0.245                      | 0.461                                    | -0.82        | 7.157                                | -0.317                     |
| space     | <b>1057 †</b>                            | <b>7.005</b> | <b>0.017 *</b>                       | <b>2.022</b>               | 0.442                                    | 0.747        | 7.854                                | 0.289                      |
| muddle    | <b>6.613 †</b>                           | <b>3.183</b> | <b>0.153</b>                         | <b>0.919</b>               | 0.385                                    | 0.428        | 11.424                               | 0.166                      |
| merge     | 0.494                                    | -1.146       | 4.692                                | -0.331                     | 0.378                                    | 0.364        | 12.223                               | 0.141                      |
| control   | 1.697                                    | 2.218        | 16.116                               | 0.64                       | 1.617                                    | 2.056        | 0.85                                 | 0.796                      |
| spirit    | <b>3.375 †</b>                           | <b>2.715</b> | <b>0.34</b>                          | <b>0.784</b>               | 1.83                                     | 2.144        | 0.714                                | 0.83                       |
| peace     | 1.547                                    | 2.149        | 0.935                                | 0.62                       | 0.429                                    | 0.688        | 8.466                                | 0.267                      |
| float     | 0.44                                     | 1.008        | 5.695                                | 0.291                      | 0.945                                    | -1.63        | 1.955                                | -0.633                     |
| past      | 0.488                                    | -1.133       | 4.794                                | -0.327                     | 0.363                                    | -0.17        | 14.705                               | -0.067                     |

183

## 184 2.2 Experiment 2: Temporal distortion during simulated hallucination

185 Experiment 1 showed that subjective experiences induced by the *Hallucination*  
186 *Machine* displayed many similarities to characteristics of the psychedelic state. Based on  
187 this finding we next used the *Hallucination Machine* to investigate another commonly  
188 reported aspect of ASC – temporal distortions<sup>5,6</sup>, by asking twenty-two participants to  
189 complete a temporal production task during presentation of *Hallucination Machine*, or  
190 during control videos.

191 One participant was excluded from the analysis due to producing intervals in the  
192 experimental session that were temporally inverted compared to the target durations. A  
193 two-way Bayesian repeated measures ANOVA consisting of factors target interval [1s, 2s, 4s]  
194 and video type (control/*Hallucination Machine*) showed the strongest evidence for an effect  
195 of target interval only (BF<sub>10</sub> = 1.178 × 10<sup>46</sup>, 1s (M=1.75 s SE=0.09s), 2s (M=2.41 s SE=0.11 s)  
196 and 4 s (M=4.38 s SE=0.16 s)). A model including only video type showed evidence in favour  
197 of the null hypothesis (BF<sub>10</sub> = 0.194), indicating that video type did not affect interval  
198 production (Figure 3). An additional two-factorial repeated measures ANOVA revealed a  
199 significant main effect of target interval (F(20,2) = 267.362, p < 0.01, η<sup>2</sup>=0.930) without the  
200 interaction ( F(20, 2) = 0.935, p < 0.401, η<sup>2</sup>=0.045). However, the main effect of video type  
201 did not reach significance (F(20,1) = 0.476, p = 0.498, η<sup>2</sup>=0.023).



202

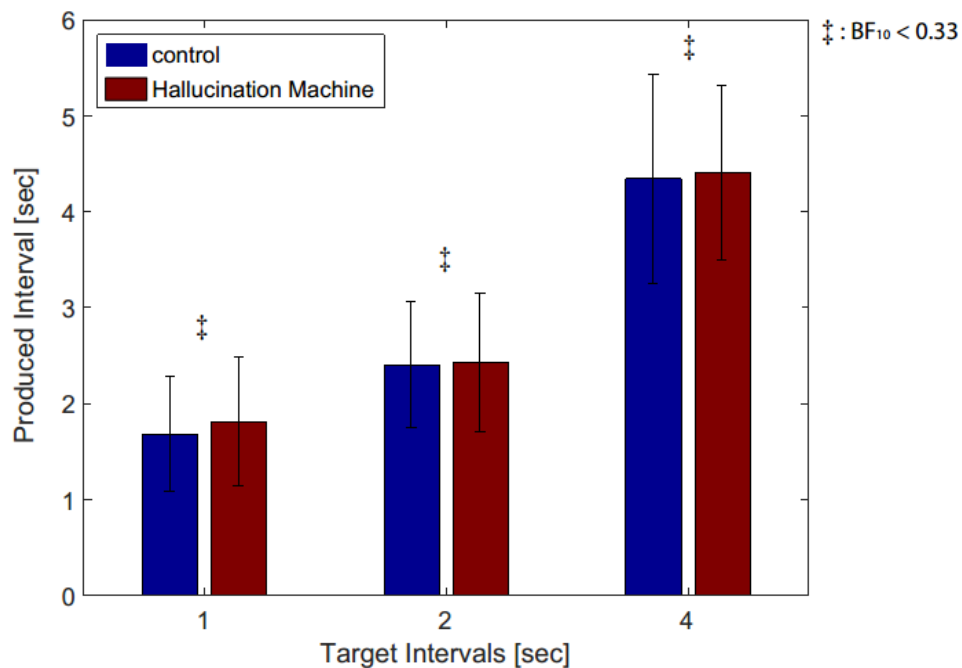

203

204 **Figure 3.** Results of temporal production task during presentation of *Hallucination Machine*  
205 or control videos. Produced time intervals are shown for both video types and target  
206 durations (1 second for low, 2 seconds for middle and 4 seconds for the high pitch tone).  
207 Bayes Factor analysis revealed strong evidence for no difference in subjective responses  
208 across video type (‡:  $BF_{10} < 1/3$ ).  
209

210 Post-hoc standard and Bayesian *t*-tests were applied to the participant's subjective  
211 ratings for the six questions about their experiences during each video (see Figure 4). These  
212 revealed some differences in the *Hallucination Machine* compared to control video.  
213 Participants' ratings of 'presence', "How much did you feel as if you were 'really there',  $BF_{10}$   
214 = 26.960,  $t(20) = 3.705$ ,  $p=0.007$ , Cohen's  $d=0.808$ ; and 'attention', "How focused were you  
215 on the time production task",  $BF_{10} = 4.830$ ,  $t(20) = 2.822$ ,  $p = 0.077$ , Cohen's  $d=0.616$  were  
216 reduced during the *Hallucination Machine*. Responses regarding Duration ( $BF_{10} = 0.278$ ) and  
217 Speed ( $BF_{10} = 0.281$ ) both revealed evidence for no difference between *Hallucination*  
218 *Machine* and control video. Other comparisons failed to reach an evidentiary threshold in  
219 both Bayesian and normal *t*-tests.

220

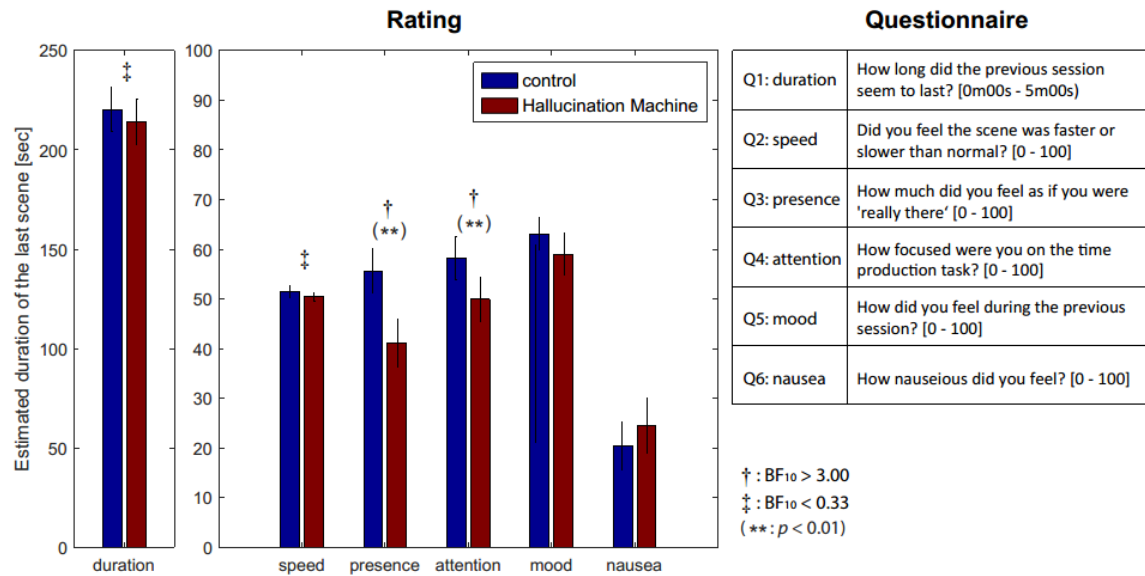

221

222 **Figure 4.** Questionnaire responses obtained in Experiment 2. Participant's estimates' of the  
223 total duration of *Hallucination Machine* and control videos in seconds (left panel).  
224 Participants' subjective ratings between *Hallucination Machine* and control videos (centre).  
225 Questions used in Experiment 2 (Right). All questions were presented inside the head  
226 mounted display and participants responded to each question using a mouse to indicate  
227 their responses via a visual analog scale. Bayes Factor analysis revealed evidence in favour  
228 of a difference across video type for Q1: duration and Q2: speed (†:  $BF_{10} > 3$ ), whereas  
229 evidence for no difference was found for Q3: presence and Q4: attention (‡:  $BF_{10} < 1/3$ ).

### 230 3.0 Discussion

231

232 We have described the implementation of the *Hallucination Machine*, which  
233 provides a novel method for investigating (visual) hallucinogenic phenomenology. It  
234 combines two technologies: Panoramic video of natural scenes presented using VR, allowing  
235 the video to be experienced in a fully immersive environment, and an application of deep  
236 convolutional neural networks (DCNNs), *Deep Dream*, which when suitably adapted can  
237 transform panoramic video to mimic hallucinatory phenomenology in a biologically plausible  
238 manner. The *Hallucination Machine* enables systematic and parameterizable manipulation  
239 of distinct aspects of altered states of consciousness (ASCs), specifically visual hallucinations,  
240 without involving the widespread systemic effects caused by pharmacological manipulations.

241 In two experiments we evaluated the effectiveness of this system. Experiment 1  
242 compared subjective experiences evoked by the *Hallucination Machine* with those elicited  
243 by both (unaltered) control videos (within subjects) and by pharmacologically induced  
244 psychedelic states (across studies). Comparisons between control and *Hallucination*  
245 *Machine* with natural scenes revealed significant differences in perceptual and imagination  
246 dimensions ('patterns', 'imagery', 'strange', 'vivid', and 'space') as well as the overall

247 intensity and emotional arousal of the experience. Notably, these specific dimensions were  
248 also reported as being increased after pharmacological administration of psilocybin<sup>31</sup>.  
249 Experiment 1 therefore showed that hallucination-like panoramic video presented within an  
250 immersive VR environment gave rise to subjective experiences that displayed marked  
251 similarities across multiple dimensions to actual psychedelic states<sup>31</sup>. Although we were not  
252 able to directly compare the *Hallucination Machine* experiences to pharmacologically  
253 induced psychedelic experiences in the same subjects, the pattern of findings in Experiment  
254 1 support the conclusion that the *Hallucination Machine* successfully simulates many  
255 aspects of ASC induced by psychedelic drugs.

256 Experiment 2 tested whether participants' perceptual and subjective ratings of the  
257 passage of time were influenced during simulated hallucinations, this was motivated by  
258 subjective reports of temporal distortion during ASC<sup>5,6</sup>. In contrast to these earlier findings,  
259 neither objective measures (using a temporal production task) nor subjective ratings  
260 (retrospective judgements of duration and speed, Q1 and Q2 in Figure 4) showed significant  
261 differences between the simulated hallucination and control conditions. This suggests that  
262 experiencing hallucination-like phenomenology is not sufficient to induce temporal  
263 distortions, raising the possibility that temporal distortions reported in pharmacologically  
264 induced ASC may depend on more general systemic effects of psychedelic compounds.

265 A crucial feature of the *Hallucination Machine* is that the *Deep Dream* algorithm  
266 used to modify the input video is highly parameterizable. Even using a single DCNN trained  
267 for a specific categorical image classification task, it is possible with *Deep Dream* to control  
268 the level of abstraction, strength, and category type of the resulting hallucinatory patterns.  
269 In the current study, we chose a relatively higher layer and arbitrary category types (i.e. a  
270 category which appeared most similar to the input image was automatically chosen) in  
271 order to maximize the chances of creating dramatic, vivid, and complex simulated  
272 hallucinations. Future extensions could 'close the loop' by allowing participants (perhaps  
273 those with experience of psychedelic or psychopathological hallucinations) to adjust the  
274 *Hallucination Machine* parameters in order to more closely match their previous  
275 experiences. This approach would substantially extend phenomenological analysis based on  
276 verbal report, and may potentially allow individual ASCs to be related in a highly specific  
277 manner to altered neuronal computations in perceptual hierarchies.

278 Another key feature of the *Hallucination Machine* is the use of highly immersive  
279 panoramic video of natural scenes presented in virtual reality (VR). Conventional CGI-based  
280 VR applications have been developed for analysis or simulation of atypical conscious states  
281 including psychosis, sensory hypersensitivity, and visual hallucinations<sup>28,29,32-34</sup>. However,  
282 these previous applications all use of CGI imagery, which while sometimes impressively  
283 realistic, is always noticeably distinct from real-world visual input and is therefore  
284 suboptimal for investigations of altered visual phenomenology. Our setup, by contrast,  
285 utilises panoramic recording of real world environments thereby providing a more  
286 immersive naturalistic visual experience enabling a much closer approximation to altered

287 states of visual phenomenology. In the present study, these advantages outweigh the  
288 drawbacks of current VR systems that utilise real world environments, notably the inability  
289 to freely move around or interact with the environment (except via head-movements).

290 Besides having potential for non-pharmacological simulation of hallucinogenic  
291 phenomenology, the *Hallucination Machine* may shed new light on the neural mechanisms  
292 underlying physiologically-induced hallucinogenic states. This potential rests on the close  
293 functional mappings between the architecture of DCNNs like those used here and the  
294 functional architecture of the primate visual system<sup>35</sup>, as well as the equivalences between  
295 the ‘top-down’ functional flow (back propagation in *Deep Dream*) of the *Deep Dream*  
296 algorithm and the role of top-down signalling in Bayesian or ‘predictive processing’ theories  
297 of perception<sup>36</sup>.

298 A defining feature of the *Deep Dream* algorithm is the use of backpropagation to  
299 alter the input image in order to minimize categorization errors. This process bears intuitive  
300 similarities to the influence of perceptual predictions within predictive processing accounts  
301 of perception. In predictive processing theories of visual perception, perceptual content is  
302 determined by the reciprocal exchange of (top-down) perceptual predictions and (bottom-  
303 up) perceptual prediction errors. The minimisation of perceptual prediction error, across  
304 multiple hierarchical layers, approximates a process of Bayesian inference such that  
305 perceptual content corresponds to the brain’s “best guess” of the causes of its sensory input.  
306 In this framework, hallucinations can be viewed as resulting from imbalances between top-  
307 down perceptual predictions (prior expectations or ‘beliefs’) and bottom-up sensory signals.  
308 Specifically, excessively strong relative weighting of perceptual priors (perhaps through a  
309 pathological reduction of sensory input, see (Abbott, Connor, Artes, & Abadi, 2007; Yacoub  
310 & Ferrucci, 2011)) may overwhelm sensory (prediction error) signals leading to hallucinatory  
311 perceptions<sup>37-42</sup>.

312 Close functional and more informal structural correspondences between DCNNs and  
313 the primate visual system have been previously noted<sup>20,35</sup>. Broadly, the responses of  
314 ‘shallow’ layers of a DCNN correspond to the activity of early stages of visual processing,  
315 while the responses of ‘deep’ layers of DCNN correspond to the activity of later stages of  
316 visual processing. These findings support the idea that feedforward processing through a  
317 DCNN recapitulates at least part of the processing relevant to the formation of visual  
318 percepts in human brains. Critically, although the DCNN architecture (at least as used in this  
319 study) is purely feedforward, the application of the *Deep Dream* algorithm approximates, at  
320 least informally, some aspects of the top-down signalling that is central to predictive  
321 processing accounts of perception. Specifically, instead of updating network weights via  
322 backpropagation to reduce classification error (as in DCNN training), *Deep Dream* alters the  
323 input image (again via backpropagation) while clamping the activity of a pre-selected DCNN  
324 layer. The network itself is not altered in this process. Therefore, the result of the *Deep*  
325 *Dream* process can be intuitively understood as the imposition of a strong perceptual prior

326 on incoming sensory data, establishing a functional (though not computational) parallel with  
327 the predictive processing account of perceptual hallucinations given above.

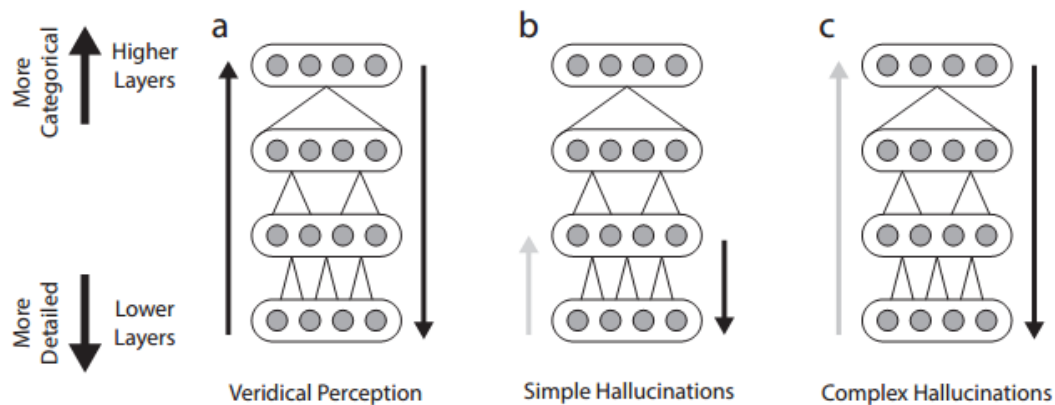

328

329 **Figure 5.** Possible hierarchical contributions to simple and complex visual hallucinations. **a.**  
330 Veridical Perception: Balanced bottom-up and top-down contributions from all levels of the  
331 hierarchy. **b.** Simple Hallucinations: perceptual content is overly influenced by visual  
332 predictions at lower network levels, with a reduced influence from lower-level input (grey  
333 arrow), emphasising features like edges and lines. **c.** Complex Hallucinations: perceptual  
334 content is overly influenced by visual predictions at higher network levels, with a reduced  
335 influence from lower-level input (grey arrow), emphasising complex object-based features.

336 What determines the nature of this heterogeneity and shapes its expression in  
337 specific instances of hallucination? The content of the visual hallucinations in humans range  
338 from coloured shapes or patterns (simple visual hallucinations)<sup>7,43</sup>, to more well-defined  
339 recognizable forms such as faces, objects, and scenes (complex visual hallucinations)<sup>44,45</sup>. As  
340 already mentioned, the output images of *Deep Dream* are dramatically altered depending  
341 on which layer of the network is clamped during the image-alteration process. Fixing higher  
342 layers tends to produce output similar to more complex hallucinations (Figure 5c, Higher  
343 Layer, see also Supplemental Video S1), while fixing lower layers tends create output images  
344 better resembling simpler geometric hallucinations (Figure 5b, Lower layer, see also  
345 Supplemental Video S2 and S3). These observations, together with the functional and  
346 structural correspondences between DCNNs and the primate visual hierarchy, is consistent  
347 with the idea that the content of visual hallucinations in humans may be shaped by the  
348 specificity with which a particular drug (or pathology) influences activity at different levels  
349 of processing within the visual hierarchy. Some example scenarios are schematically  
350 illustrated in Figure 5. In comparison to normal (veridical) perception (Figure 5a), simple  
351 kaleidoscopic phenomenology - which is somewhat characteristic of psychedelic states<sup>7,43</sup> -  
352 could be explained by increased influence of lower layers of the visual system during the  
353 interpretation of visual input, in the absence of contributions from higher categorical layers  
354 (Figure 5b). Conversely, complex visual hallucinations could be explained by the over

355 emphasis of predictions from higher layers of the visual system, with a reduced influence  
356 from lower-level input (Figure 5c).

#### 357 **4.0 Conclusion**

358 We have described a method for simulating altered visual phenomenology similar to  
359 visual hallucinations reported in the psychedelic state. Our *Hallucination Machine* combines  
360 panoramic video and audio presented within a head-mounted display, with a modified  
361 version of ‘Deep Dream’ algorithm, which is used to visualize the activity and selectivity of  
362 layers within DCNNs trained for complex visual classification tasks. In two experiments we  
363 found that the subjective experiences induced by the *Hallucination Machine* differed  
364 significantly from control (non-‘hallucinogenic’) videos, while bearing phenomenological  
365 similarities to the psychedelic state (following administration of psilocybin). The immersive  
366 nature of our paradigm, the close correspondence in representational levels between layers  
367 of DCNNs and the primate visual hierarchy along with the informal similarities between  
368 DCNNs and biological visual systems, together suggest that the *Hallucination Machine* is  
369 capable of simulating biologically plausible and ecologically valid visual hallucinations. In  
370 addition, the method carries promise for isolating the network basis of specific altered  
371 visual phenomenological states, such as the differences between simple and complex visual  
372 hallucinations. Overall, the *Hallucination Machine* provides a powerful new tool to  
373 complement the resurgence of research into altered states of consciousness.

## 374 5.0 Methods

### 375 5.1 Hallucination Machine

376 In brief, the *Hallucination Machine* was created by applying the *Deep Dream*  
377 algorithm to each frame of a pre-recorded panoramic video presented using a HMD (Figure  
378 1). Participants could freely explore the virtual environment by moving their head,  
379 experiencing highly immersive dynamic hallucination-like visual scenes.

#### 380 5.1.1 Panoramic video and presentation

381 The video footage was recorded on the University of Sussex campus using a  
382 panoramic video camera (Point Grey, Ladybug 3). The frame rate of the video was 16 fps at  
383 a resolution of 4096 x 2048. All video footage was presented using a head mounted display  
384 (Oculus Rift, Development Kit 2) using in-house software developed using Unity3D.

#### 385 5.1.2 DCNN specification and application of *Deep Dream*

386 The DCNN – a deeply layered feedforward neural network – used in this study had  
387 been pre-trained on a thousand categories of natural photographs used in the Large Scale  
388 Visual Recognition Challenge 2010 (ILSVRC2010) <sup>17,46</sup>. During this training procedure,  
389 features in all layers are learned via backpropagation (with various modifications) to  
390 associate a set of training images to distinct categories. Consequently, the trained network  
391 implements a mapping from the pixels of the input image to the categories, represented as  
392 activation of specific units of the top layer of the network. Given this network, to create the  
393 panoramic video we applied the *Deep Dream* algorithm frame-by-frame to the raw video  
394 footage.

395 The *Deep Dream* algorithm also uses error backpropagation, but instead of updating  
396 the weights between nodes in the DCNN, it fixes the weights between nodes across the  
397 entire network and then iteratively updates the input image itself to minimize  
398 categorization errors via gradient descent. Over multiple iterations this process alters the  
399 input image, whatever it might be (e.g., a human face), so that it encompasses features that  
400 the layer of the DCNN has been trained to select (e.g., a dog). When applied while fixing a  
401 relatively low level of the network, the result is an image emphasizing local geometric  
402 features of the input. When applied while fixing relatively high levels of the network, the  
403 result is an image that imposes object-like features on the input, resembling a complex  
404 hallucination. Examples of the output of *Deep Dream* used in Experiments 1 and 2 are  
405 shown in Figure 1.

406 Although the original *Deep Dream* program was intended to process a single static  
407 image (Mordvintsev, Tyka, et al., 2015), others have developed implementations of this  
408 algorithm that process image sequences in order to make videos by blending the  
409 hallucinatory content of the previous frame with the current frame (Roelof, 2015; Samim,  
410 2015). The principle here is to take a user defined proportion from 0-1 (blending ratio) of  
411 the previous frame's hallucinatory patterns (0 = no information, 1 = all information) and

412 integrate it into the current frame. In this way, each frame inherits some of the  
413 hallucinatory content of the previous frame, as opposed to *Deep Dream* starting from  
414 scratch for each frame. This frame-to-frame inheritance enables the hallucinatory patterns  
415 to remain relatively constant as the video unfolds. We extended one such implementation  
416 <sup>47</sup> to optimise the hallucinogenic properties of the video. In our extension, the optical flow  
417 of each frame is calculated by comparing the difference in the movement of all pixels  
418 between the current and previous frame. The hallucinatory patterns from areas where the  
419 optical flow was detected is merged to the current (not-yet-hallucinatory) frame based on  
420 the weighting provided by the blending ratio. The *Deep Dream* algorithm is then applied to  
421 this merged frame. We also optimised the blending ratio between each pair of frames,  
422 setting different blending ratios in areas of the image with high (foreground, moving areas,  
423 blending ratio of 0.9) or low (background static areas, blending ratio of 0.1) optical flow. This  
424 was done to avoid saturation of areas of the image with low optical flows by the higher  
425 blending ratios used for areas with high optical flow. The details of our implementation of  
426 *Deep Dream* are provided in the supplemental material. Our software for creating the *Deep*  
427 *Dream* video can be found on GitHub <sup>48</sup>. The *Deep Dream* video used throughout the  
428 reported experiments was generated by selecting a higher DCNN layer, which responds  
429 selectively to higher-level categorical features (layers = 'inception\_4d/pool', octaves = 3,  
430 octave scale = 1.8, iterations = 32, jitter = 32, zoom = 1, step size = 1.5, blending ratio for  
431 optical flow = 0.9, blending ratio for background = 0.1).

432

## 433 5.2 Experiment 1: Subjective experience during simulated hallucination

### 434 5.2.1 Participants

435 Twelve participants completed Experiment 1 (mean age = 21.1, SD = 2.23; 7 female).  
436 Participants provided informed consent before taking part and received £10 or course  
437 credits as compensation for their time. All methods were carried out in accordance with  
438 approved guidelines provided by the University of Sussex, Research Ethics Committee.

### 439 5.2.2 Experimental Design

440 Both experiments were performed in a dedicated VR lab. Participants were fitted  
441 with a head-mounted display before starting the experiment and exposed, in a counter-  
442 balanced manner, to either the *Hallucination Machine* or the original unaltered (control)  
443 video footage. Each video presentation lasted 3 minutes and was repeated twice, with a  
444 180-degree direction flip of the initial orientation between the two presentations  
445 (presenting the part of the scene that would have been directly behind their viewpoint in  
446 the first presentation) to help ensure that participants experienced the majority of the  
447 panoramically-recorded scene. Participants were encouraged to freely investigate the scene  
448 in a naturalistic manner. While sitting on a stool they could explore the video footage with  
449 3-degrees of freedom rotational movement. While the video footage is spherical, there is a  
450 blind spot of approximately 33-degrees located at the bottom of the sphere due to the field



451 of view of the camera. After each video, participants were asked to rate their experiences  
452 for each question via an ASC questionnaire which used a visual analog scale for each  
453 question (see Figure 2c for questions used). We used a modified version of an ASC  
454 questionnaire, which was previously developed to assess the subjective effects of  
455 intravenous psilocybin in fifteen healthy human participants<sup>31</sup>. All data referring to  
456 Psilocybin was taken from this study<sup>31</sup>.

### 457 5.2.3 Analysis

458 Bayesian paired *t*-tests were used to compare ASC questionnaire subjective ratings  
459 between the control condition and the *Hallucination Machine*, while Bayesian independent  
460 *t*-tests were used to compare *Hallucination Machine* with subjective ratings following  
461 psilocybin administration (data taken from the original study<sup>31</sup>). We quantified how close to  
462 the null (no difference between results), or to the alternative hypothesis (difference in  
463 results), each result was using JASP<sup>49</sup> with a default Cauchy prior of .707 half-width at half-  
464 maximum<sup>50</sup>. A  $BF_{10} > 3.0$  is interpreted as evidence for accepting the alternative hypothesis  
465 (i.e. there is a difference), whereas  $BF_{10} < 1/3$  is interpreted as evidence for accepting the  
466 null hypothesis (i.e. there is no difference)<sup>51</sup>. Standard paired *t*-test Bonferroni corrected for  
467 multiple comparisons were also conducted.

## 468 5.3 Experiment 2: Temporal distortion during simulated hallucination

### 469 5.3.1 Participants

470 A new group of Twenty-two participants that did not participate in Experiment 1  
471 completed Experiment 2 ( $M_{age} = 23.9$ ,  $SD = 6.71$ , 13 female). Participants provided informed  
472 consent before taking part and received £10 or course credits as compensation for their  
473 time. All methods were carried out in accordance with approved guidelines provided by the  
474 University of Sussex, Research Ethics Committee.

### 475 5.3.2 Experimental Design

476 The experiment began with a practice session of a standard temporal production  
477 task. In each of 20 trials, participants heard one of three tones, each of a different pitch  
478 (low: 220Hz, middle: 440Hz, and high: 1760Hz, each lasting 250 milliseconds). On each trial  
479 the pitch was randomly selected. Participants were asked to produce specific time intervals  
480 for each tone (1 second for low, 2 seconds for middle and 4 seconds for the high pitch  
481 tone)<sup>52,53</sup>. Participants were instructed to respond immediately after the tone had ceased by  
482 holding the left mouse button down for the target time interval for each specific tone  
483 (Figure 6). After producing the interval, they were shown both their produced interval, and  
484 the target interval, as two dots on a one-dimensional scale, as well as a numeric  
485 representation (e.g. produced interval “2.4 seconds”, target interval “2.0 seconds”). The  
486 average numbers of tones per practice session was 6.12 ( $SD = 1.96$ ) Low, 6.54 ( $SD = 1.61$ )  
487 Middle, and 6.33 ( $SD = 2.18$ ) High. Participants had to repeat the practice session if the  
488 Pearson’s correlation between the target and produced intervals was less than 0.5.

489           Once the practice was finished, participants began the experimental session. This  
490 consisted of 12 blocks. In each block a panoramic video was shown; either the control video  
491 (6 blocks) or the *Hallucination Machine* (6 blocks), and similar to Experiment 1, participants  
492 were instructed to explore the scene freely in a naturalistic manner. The order of the videos  
493 was counter-balanced across participants. Each block lasted 3 minutes, leading to a total  
494 exposure of 18 minutes for each video type. While participants explored the immersive  
495 video, low, middle or high pitch tones were presented in a random order (the average  
496 numbers of tones per block were 6.17 ( $SD = 2.02$ ) Low, 6.16 ( $SD = 2.00$ ) Middle, 6.21 ( $SD =$   
497 1.94) High for *Hallucination Machine*, and 6.62 ( $SD = 2.44$ ) Low, 6.63 ( $SD = 2.42$ ) Middle, and  
498 6.61 ( $SD = 2.55$ ) High for the control video). Immediately after hearing the tone, participants  
499 had to produce the interval relating to the tone (one second, two seconds, or four seconds)  
500 (Figure 6). Following the participant's response there was a random inter-trial interval of  
501 between 2 and 4 seconds (uniformly distributed). After each block, participants answered  
502 six questions about their experiences during the video (Figure 4). The questions were  
503 presented inside the head mounted display and participants responded to the questions  
504 using a mouse to indicate a value on a visual analog scale.

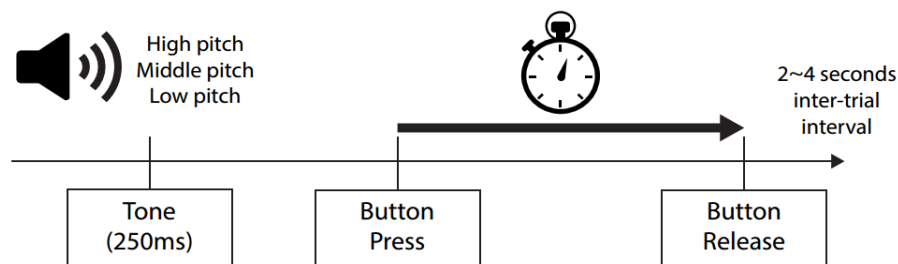

505

506 **Figure 6.** Experiment 2 temporal production task structure. While viewing either panoramic  
507 *Hallucination Machine* or control videos, participants were asked to produce one of three  
508 specific time intervals. Each time interval had been associated with a differing pitch tone  
509 during a practice session (1 second for low, 2 seconds for middle and 4 seconds for the high  
510 pitch tone). Participants responded immediately after the tone had ceased by holding the  
511 left mouse button down for the target time interval for each specific tone. After the button  
512 was released there was an inter-trial interval of between 2-4 seconds.

### 513 5.3.3 Analysis

514           A Bayesian two-factorial repeated measures ANOVA consisting of the factors interval  
515 production [1s, 2s, 4s] and video type (control/*Hallucination Machine*) was used to  
516 investigate the effect of video type on interval production. A standard two-factorial  
517 repeated measures ANOVA using the same factors as above was also conducted.

518           A two-factorial repeated measures ANOVA consisting of the factors interval  
519 production [1s, 2s, 4s] and video type (control/*Hallucination Machine*) was used to  
520 investigate the effect of video type on interval production. Similar to Experiment 1, for cases  
521 in which standard statistics did not reveal a significant difference, we quantified how close

522 to the null (no difference between results) or alternative hypothesis (difference in results)  
523 each result was by an additional two-way Bayesian ANOVA using the same factors as above.  
524 In a similar fashion, for cases in which standard *t*-tests did not reveal significant differences  
525 in subjective ratings between video type we used additional Bayesian *t*-tests.

526

527 Data Availability: Video materials used in the study are available in the supplemental  
528 material. The datasets generated in Experiment 1 and 2 are available from the  
529 corresponding author upon request.

530

531 Acknowledgements: K.S., D.J.S., and A.K.S. are grateful to the Dr. Mortimer and Theresa  
532 Sackler Foundation, which supports the Sackler Centre for Consciousness Science. W.R. is  
533 supported by EU FET Proactive grant TIMESTORM: Mind and Time: Investigation of the  
534 Temporal Traits of Human-Machine Convergence. We would also like to thank Ed Venables  
535 for his help with data collection and Benjamin Ador for assistance creating the radar plot.

536

537 Author Contributions

538 K.S., W.R., D.S., A.K.S., conceived and designed the study. K.S. created the materials and  
539 developed the *Hallucination Machine* system. K.S. W.R. and D.S. designed and carried out  
540 the analyses and statistical testing. K.S., D.S., and A.K.S. designed Experiment 1 and  
541 recorded the data. K.S., W.R., and A.K.S. designed Experiment 2 and recorded the data. K.S.,  
542 W.R., D.S., A.K.S. wrote the manuscript together.

543 Additional Information

544 Competing Interests: The authors declare no competing financial interests.

545 **6.0 References**

- 546 1. Oxman, T. E., Rosenberg, S. D., Schnurr, P. P., Tucker, G. J. & Gala, G. The language of  
547 altered states. *J. Nerv. Ment. Dis.* **176**, 401–8 (1988).
- 548 2. Tart, C. T. SCIENTIFIC FOUNDATIONS FOR THE STUDY OF ALTERED STATES OF  
549 CONSCIOUSNESS. *Sci. Found. study altered states Conscious.* **3**, 93–124 (1972).
- 550 3. Bayne, T. & Hohwy, J. Modes of Consciousness. *Conscious. after Sev. Brain Damage*  
551 *Medical, Leg. Ethical, Philos. Perspect.* 1–29 (2007).
- 552 4. Carhart-Harris, R. L. *et al.* Psilocybin with psychological support for treatment-  
553 resistant depression: an open-label feasibility study. *The Lancet Psychiatry* **3**, 619–627  
554 (2016).
- 555 5. Aronson, H., Silverstein, A. B. & Klee, G. D. Influence of Lysergic Acid Diethylamide  
556 (LSD-25) on Subjective Time. *Arch. Gen. Psychiatry* **1**, 469 (1959).
- 557 6. Boardman, W. K., Goldstone, S. & Lhamon, W. T. Effects of lysergic acid diethylamide  
558 (LSD) on the time sense of normals; a preliminary report. *AMA. Arch. Neurol.*  
559 *Psychiatry* **78**, 321–4 (1957).
- 560 7. Cowan, J. D. in *The Neuroscience of Visual Hallucinations* (eds. Collerton, D.,  
561 Mosimann, U. P. & Perry, E.) 219–254 (John Wiley & Sons, Ltd, 2015).
- 562 8. Waters, F. *et al.* Visual Hallucinations in the Psychosis Spectrum and Comparative  
563 Information From Neurodegenerative Disorders and Eye Disease. *Schizophr. Bull.* **40**,  
564 S233–S245 (2014).
- 565 9. Revonsuo, A., Kallio, S. & Sikka, P. What is an altered state of consciousness? *Philos.*  
566 *Psychol.* **22**, 187–204 (2009).
- 567 10. Cavanna, A. E., Bagshaw, A. P. & McCorry, D. The Neural Correlates of Altered  
568 Consciousness During Epileptic Seizures. *Discov. Med.* **8**, 31–36 (2009).
- 569 11. Gallimore, A. R. Restructuring consciousness -the psychedelic state in light of  
570 integrated information theory. *Front. Hum. Neurosci.* **9**, 346 (2015).
- 571 12. Carhart-Harris, R. L. *et al.* The entropic brain: a theory of conscious states informed by  
572 neuroimaging research with psychedelic drugs. *Front. Hum. Neurosci.* **8**, 20 (2014).
- 573 13. Carhart-Harris, R. L. *et al.* Neural correlates of the psychedelic state as determined by  
574 fMRI studies with psilocybin. *Proc. Natl. Acad. Sci. U. S. A.* **109**, 2138–43 (2012).
- 575 14. McKenna, D. J. Clinical investigations of the therapeutic potential of ayahuasca:  
576 rationale and regulatory challenges. *Pharmacol. Ther.* **102**, 111–129 (2004).
- 577 15. LeCun, Y., Bengio, Y. & Hinton, G. Deep learning. *Nat. Rev.* **521**, 436–444 (2015).
- 578 16. Schmidhuber, J. Deep learning in neural networks: An overview. *Neural Networks* **61**,  
579 85–117 (2015).
- 580 17. Krizhevsky, A., Sutskever, I. & Hinton, G. E. ImageNet Classification with Deep  
581 Convolutional Neural Networks. *Adv. Neural Inf. Process. Syst.* 1–9 (2012).
- 582 18. Szegedy, C. *et al.* Going Deeper with Convolutions. in *Computer Vision and Pattern*

- 583            *Recognition (CVPR)* (2015).
- 584    19.    Kriegeskorte, N. Deep Neural Networks: A New Framework for Modeling Biological  
585            Vision and Brain Information Processing. *Annu. Rev. Vis. Sci.* **1**, 417–446 (2015).
- 586    20.    Yamins, D. L. K. & Dicarlo, J. J. Using goal-driven deep learning models to understand  
587            sensory cortex. *Nat. Neurosci.* **19**, (2016).
- 588    21.    Horikawa, T. & Kamitani, Y. Generic decoding of seen and imagined objects using  
589            hierarchical visual features. *Nat. Commun.* **8**, 15037 (2017).
- 590    22.    Cadieu, C. F. *et al.* Deep Neural Networks Rival the Representation of Primate IT  
591            Cortex for Core Visual Object Recognition. *PLoS Comput. Biol.* **10**, (2014).
- 592    23.    Khaligh-Razavi, S. M. & Kriegeskorte, N. Deep Supervised, but Not Unsupervised,  
593            Models May Explain IT Cortical Representation. *PLoS Comput. Biol.* **10**, (2014).
- 594    24.    Mordvintsev, A., Olah, C. & Tyka, M. Inceptionism: Going Deeper into Neural  
595            Networks. *Google Research Blog* (2015). Available at:  
596            [http://googleresearch.blogspot.co.uk/2015/06/inceptionism-going-deeper-into-](http://googleresearch.blogspot.co.uk/2015/06/inceptionism-going-deeper-into-neural.html)  
597            [neural.html](http://googleresearch.blogspot.co.uk/2015/06/inceptionism-going-deeper-into-neural.html).
- 598    25.    Mordvintsev, A., Tyka, M. & Olah, C. deepdream (google/deepdream). *GitHub*  
599            *repository* (2015). Available at: <https://github.com/google/deepdream>.
- 600    26.    Shanon, B. Ayahuasca Visualizations A Structural Typology. *J. Conscious. Stud.* 3–30  
601            (2002).
- 602    27.    Siegel, R. K. & Jarvik, M. E. in *Hallucinations: behavior, experience and theory* (eds.  
603            Siegel, R. K. & West, L. J.) 81–161 (Wiley, 1975).
- 604    28.    Banks, J. *et al.* Constructing the hallucinations of psychosis in Virtual Reality. *J. Netw.*  
605            *Comput. Appl.* **27**, 1–11 (2004).
- 606    29.    Yellowlees PM & Cook JN. Education about hallucinations using an internet. *Ovid*  
607            *Medlin. Psychiatry* **30**, 534–539 (2006).
- 608    30.    Dittrich, A. The Standardized Psychometric Assessment of Altered States of  
609            Consciousness (ASCs) in Humans. *Pharmacopsychiatry* **31**, 80–84 (1998).
- 610    31.    Muthukumaraswamy, S. D. *et al.* Broadband Cortical Desynchronization Underlies the  
611            Human Psychedelic State. *J. Neurosci.* **33**, 15171–15183 (2013).
- 612    32.    Banks, J. *et al.* A Virtual Environment to Simulate the Experience of Psychosis. in *Proc.*  
613            *VIIIth Digital Image Computing: Techniques and Applications* (ed. Sun C., Talbot H., O.  
614            S. and A. T.) (2003).
- 615    33.    Jingyuan, P. O., Zhao, J. & Tennyson, R. *Technology Enhanced Learning for People with*  
616            *Disabilities: Approaches and Applications*. (IGI Global, 2010).
- 617    34.    Kay, T. Auti-Sim: A playable simulation of sensory hypersensitivity. *YouTube Video*  
618            (2013). Available at: <https://www.youtube.com/watch?v=DwS-qm8hUxc>.
- 619    35.    Kriegeskorte, N. Deep neural networks : a new framework for modelling biological  
620            vision and brain information processing. *biRxiv* (2015).

- 621 doi:<http://dx.doi.org/10.1101/029876>
- 622 36. Whittington, J. & Bogacz, R. *Learning in cortical networks through error back-*  
623 *propagation. bioRxiv* (Cold Spring Harbor Labs Journals, 2015). doi:10.1101/035451
- 624 37. Teufel, C. *et al.* Shift toward prior knowledge confers a perceptual advantage in early  
625 psychosis and psychosis-prone healthy individuals. *Proc. Natl. Acad. Sci. U. S. A.* **112**,  
626 13401–6 (2015).
- 627 38. Corlett, P. R., Frith, C. D. & Fletcher, P. C. From drugs to deprivation: a Bayesian  
628 framework for understanding models of psychosis. *Psychopharmacology (Berl.)* **206**,  
629 515–30 (2009).
- 630 39. De Ridder, D., Vanneste, S. & Freeman, W. The Bayesian brain: Phantom percepts  
631 resolve sensory uncertainty. *Neurosci. Biobehav. Rev.* **44**, 4–15 (2014).
- 632 40. Friston, K. J. Hallucinations and perceptual inference. *Behav. Brain Sci.* **28**, 764–766  
633 (2005).
- 634 41. Reichert, D. P., Series, P. & Storkey, A. J. Hallucinations in Charles Bonnet Syndrome  
635 Induced by Homeostasis : a Deep Boltzmann Machine Model. *Nips 2020–2028* (2010).
- 636 42. Reichert, D. P., Seriès, P. & Storkey, A. J. Charles Bonnet syndrome: evidence for a  
637 generative model in the cortex? *PLoS Comput. Biol.* **9**, e1003134 (2013).
- 638 43. Bressloff, P. C., Cowan, J. D., Golubitsky, M., Thomas, P. J. & Wiener, M. C. Geometric  
639 visual hallucinations, Euclidean symmetry and the functional architecture of striate  
640 cortex. *Philos. Trans. R. Soc. Lond. B. Biol. Sci.* **356**, 299–330 (2001).
- 641 44. Collerton, D., Perry, E. & McKeith, I. Why people see things that are not there: a novel  
642 Perception and Attention Deficit model for recurrent complex visual hallucinations.  
643 *Behav. Brain Sci.* **28**, 737–57–94 (2005).
- 644 45. Manford, M. & Andermann, F. Complex visual hallucinations. Clinical and  
645 neurobiological insights. *Brain* **121**, 1819–1840 (1998).
- 646 46. Russakovsky, O. *et al.* ImageNet Large Scale Visual Recognition Challenge. *Int. J.*  
647 *Comput. Vis.* **115**, 211–252 (2015).
- 648 47. Samim. DeepDream Animator (samim23/DeepDreamAnim). *GitHub repository* (2015).  
649 Available at: <https://github.com/samim23/DeepDreamAnim>.
- 650 48. Ksk-S. DeepDreamVideoOpticalFlow (ksk-S/DeepDreamVideoOpticalFlow). *GitHub*  
651 *repository* (2017). Available at: [https://github.com/ksk-](https://github.com/ksk-S/DeepDreamVideoOpticalFlow)  
652 [S/DeepDreamVideoOpticalFlow](https://github.com/ksk-S/DeepDreamVideoOpticalFlow).
- 653 49. JASP Team. JASP (Version 0.8.0.0)[Computer software]. (2016).
- 654 50. Rouder, J. N., Speckman, P. L., Sun, D., Morey, R. D. & Iverson, G. Bayesian t tests for  
655 accepting and rejecting the null hypothesis. *Psychon. Bull. Rev.* **16**, 225–237 (2009).
- 656 51. Wagenmakers, E.-J. A practical solution to the pervasive problems of p values.  
657 *Psychon. Bull. Rev.* **14**, 779–804 (2007).
- 658 52. Field, D. T. & Groeger, J. A. Temporal interval production and short-term memory.

- 659            *Percept. Psychophys.* **66**, 808–819 (2004).
- 660    53.    Fortin, C., Rousseau, R., Bourque, P. & Kirouac, E. Time estimation and concurrent  
661            nontemporal processing: Specific interference from short-term-memory demands.  
662            *Percept. Psychophys.* **53**, 536–548 (1993).
- 663
